# Supplementary material for: The reaction between the bromine atom and the water trimer: high level theoretical studies
Source: Royal Society of Chemistry journal article supplement (doi:10.1039/d2cp03525a), 2022-01-01
Supplement: d2cp03525a1.pdf [file d2cp03525a1.pdf]

*Supporting Information*

**The Reaction between the Bromine Atom and the Water Trimer:  
High Level Theoretical Studies**

Guoliang Li,<sup>\*a</sup> Ying Yao,<sup>a</sup> Yan Lin,<sup>a</sup> Yan Meng,<sup>a</sup>  
Yaoming Xie,<sup>b</sup> and Henry F. Schaefer III<sup>\*b</sup>

<sup>a</sup>*Key Laboratory of Theoretical Chemistry of Environment, Ministry of Education; Center for Computational Quantum Chemistry, School of Chemistry, South China Normal University, Guangzhou, 510006, P. R. China*

<sup>b</sup>*Department of Chemistry and Center for Computational Quantum Chemistry, University of Georgia, Athens, Georgia, 30602, USA*

e-mails: [ccq@uga.edu](mailto:ccq@uga.edu) and [glli@scnu.edu.cn](mailto:glli@scnu.edu.cn)

**Figure S1.** Three pathways of the water trimer reaction  $\text{Br} + (\text{H}_2\text{O})_3 \rightarrow \text{HBr} + (\text{H}_2\text{O})_2\text{OH}$  with the MPW1K/cc-pVTZ(-PP) method.

**Table S1.** Harmonic vibrational frequencies and zero-point energies for the stationary points of the  $\text{Br} + (\text{H}_2\text{O})_3 \rightarrow \text{HBr} + (\text{H}_2\text{O})_2\text{OH}$  reaction obtained at the CCSD(T)/cc-pVTZ(-PP) level of theory.

**Table S2.** Cartesian coordinates for optimized stationary points in pathway (a) of the  $\text{Br} + (\text{H}_2\text{O})_3 \rightarrow \text{HBr} + (\text{H}_2\text{O})_2\text{OH}$  reaction at the MPW1K/cc-pVTZ(-PP) level of theory.

**Table S3.** Cartesian coordinates for optimized stationary points in pathway (b) of the  $\text{Br} + (\text{H}_2\text{O})_3 \rightarrow \text{HBr} + (\text{H}_2\text{O})_2\text{OH}$  reaction at the MPW1K/cc-pVTZ(-PP) level of theory.

**Table S4.** Cartesian coordinates for optimized stationary points in pathway (c) of the  $\text{Br} + (\text{H}_2\text{O})_3 \rightarrow \text{HBr} + (\text{H}_2\text{O})_2\text{OH}$  reaction at the MPW1K/cc-pVTZ(-PP) level of theory.

**Table S5.** Cartesian coordinates for optimized stationary points in pathway (a) of the  $\text{Br} + (\text{H}_2\text{O})_3 \rightarrow \text{HBr} + (\text{H}_2\text{O})_2\text{OH}$  reaction at the CCSD(T)/cc-pVDZ(-PP) level of theory.

**Table S6.** Cartesian coordinates for optimized stationary points in pathway (a) of the  $\text{Br} + (\text{H}_2\text{O})_3 \rightarrow \text{HBr} + (\text{H}_2\text{O})_2\text{OH}$  reaction at the CCSD(T)/cc-pVTZ(-PP) level of theory.

Complete Gaussian 16 reference.

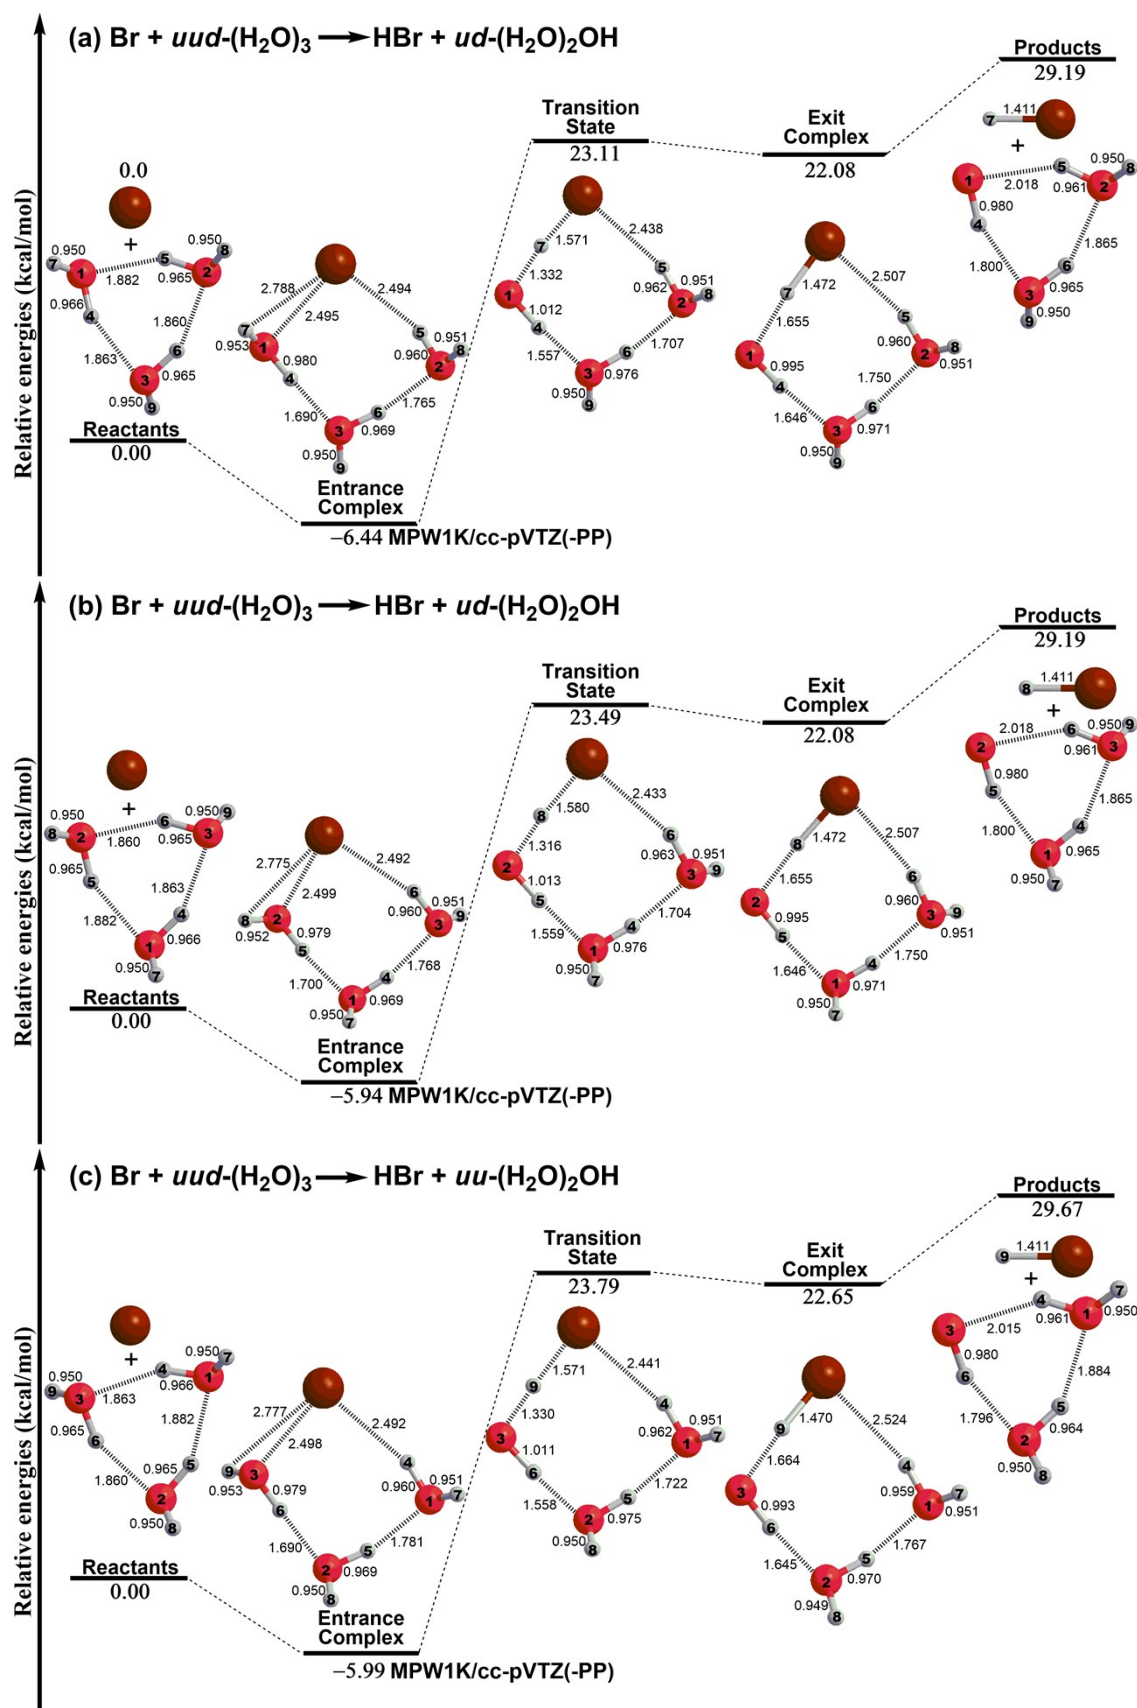

**Figure S1** Three pathways of the water *trimer* reaction  $\text{Br} + (\text{H}_2\text{O})_3 \rightarrow \text{HBr} + (\text{H}_2\text{O})_2\text{OH}$  with the MPW1K/cc-pVTZ(-PP) method. All bond distances were given in angstroms.

**Table S1.** Harmonic vibrational frequencies (in  $\text{cm}^{-1}$ ) and zero-point energies (ZPE, in kcal/mol) for the stationary points of the  $\text{Br} + (\text{H}_2\text{O})_3 \rightarrow \text{HBr} + (\text{H}_2\text{O})_2\text{OH}$  reaction obtained at the CCSD(T)/cc-pVTZ(-PP) level of theory. Experimental results are also shown for comparison.

|                                                 | ZPE   | $\Delta$ ZPE | Vibrational Frequencies                                                                                                        |
|-------------------------------------------------|-------|--------------|--------------------------------------------------------------------------------------------------------------------------------|
| $(\text{H}_2\text{O})_3$                        | 46.46 | 0.00         | 188, 194, 202, 209, 228, 253, 360, 372, 471, 614, 689, 926, 1685, 1690, 1707, 3613, 3683, 3689, 3903, 3907, 3909               |
| Entrance Complex                                | 46.67 | +0.21        | 30, 60, 114, 179, 195, 231, 249, 259, 270, 384, 403, 462, 516, 771, 933, 1672, 1687, 1704, 3473, 3620, 3760, 3866, 3900, 3901  |
| Transition State                                | 41.88 | -4.58        | 650i, 33, 76, 122, 210, 229, 279, 298, 313, 446, 533, 595, 716, 768, 879, 1040, 1200, 1672, 1701, 3108, 3546, 3736, 3898, 3899 |
| Exit Complex                                    | 42.90 | -3.56        | 30, 54, 112, 145, 186, 227, 258, 278, 284, 402, 429, 491, 570, 629, 785, 954, 1673, 1699, 2275, 3357, 3602, 3766, 3901, 3906   |
| $(\text{H}_2\text{O})_2\text{OH}$               | 37.85 | -4.82        | 163, 196, 211, 230, 252, 291, 375, 534, 557, 668, 916, 1667, 1687, 3498, 3675, 3737, 3908, 3911                                |
| HBr                                             | 3.79  |              | 2649                                                                                                                           |
| <b>Experiment</b>                               |       |              |                                                                                                                                |
| Bonded OH in $(\text{H}_2\text{O})_3$           |       |              | 3533, <sup>a</sup> 3544/3529, <sup>b</sup> 3528, <sup>c</sup> 3531.8 $\pm$ 1.2, <sup>d</sup> 3516.7 $\pm$ 2.3 <sup>d</sup>     |
| Free OH in $(\text{H}_2\text{O})_3$             |       |              | 3726, <sup>a</sup> 3717 <sup>b</sup>                                                                                           |
| OH radical in $(\text{H}_2\text{O})_2\text{OH}$ |       |              | 3365.2 <sup>c</sup>                                                                                                            |
| HBr                                             |       |              | 2649 <sup>e</sup>                                                                                                              |

<sup>a</sup> In gas phase from Ref. 40. <sup>b</sup> In liquid He from Ref. 40. <sup>c</sup> In solid Ne from Ref. 41.

<sup>d</sup> From Ref. 42. <sup>e</sup> From Ref. 43.

**Table S2.** Cartesian coordinates (in Å) for optimized stationary points in pathway (a) of the  $\text{Br} + (\text{H}_2\text{O})_3 \rightarrow \text{HBr} + (\text{H}_2\text{O})_2\text{OH}$  reaction, as shown in Figure S1 and Figure 1, obtained at the MPW1K/cc-pVTZ(-PP) level of theory.

|                                                      |                                                       |
|------------------------------------------------------|-------------------------------------------------------|
| <b><i>uud</i>-(H<sub>2</sub>O)<sub>3</sub>, in Å</b> | <b><i>ud</i>-(H<sub>2</sub>O)<sub>2</sub>OH, in Å</b> |
| 0 1                                                  | 0 2                                                   |
| O,0.2973653142,0.7447415337,-0.141269676             | O,0.195142335,0.2083715694,-0.0484520945              |
| H,0.077234833,0.6208494016,0.7743246814              | H,-0.1019051642,-0.2141410142,0.7663837464            |
| H,1.0474808588,0.162329631,-0.3158292958             | H,0.9710892866,-0.2623113864,-0.3294134349            |
| O,2.1669429919,2.4961115369,-1.1813094804            | O,-0.5553236426,-0.1081958361,2.57257675              |
| H,1.3527864973,2.1637343813,-0.7840553349            | H,-0.4169679725,0.8425889894,2.5653494144             |
| H,2.4665837078,3.2024870649,-0.621560374             | H,-1.433486602,-0.2455128399,2.9084534231             |
| O,2.799396646,-0.1648077755,-0.8592898722            | O,0.1669055015,2.4540280054,1.4997418571              |
| H,2.8681295377,0.777530389,-1.0579689104             | H,0.2774685537,1.8098320639,0.7689781584              |
| H,2.9451677129,-0.6152350913,-1.6830653029           |                                                       |
| <b>Entrance Complex, in Å</b>                        | <b>HBr, in Å</b>                                      |
| 0 2                                                  | 0 1                                                   |
| O,0.,0.,0.                                           | H,0.,0.,0.04429631                                    |
| H,0.,0.,0.95273                                      | Br,0.,0.,1.45570369                                   |
| H,0.9420413669,0.,-0.2690898391                      |                                                       |
| O,2.5612991915,2.7023031103,-1.4517156281            |                                                       |
| H,1.6240327565,2.8256357628,-1.28583154              |                                                       |
| H,3.0030011285,3.3374338231,-0.8985561049            |                                                       |
| O,2.5664811284,0.0839073585,-0.7272513288            |                                                       |
| H,2.7098127405,1.0002754046,-1.0093133002            |                                                       |
| H,2.8112325811,-0.4632228616,-1.4647412367           |                                                       |
| Br,-0.6400739007,2.3884131431,-0.3345165171          |                                                       |
| <b>Transition State, in Å</b>                        |                                                       |
| 0 2                                                  |                                                       |
| O,-0.0079945675,0.000639368,0.0077430607             |                                                       |
| H,-0.0235312569,-0.0214881473,1.3390099644           |                                                       |
| H,0.9744428129,0.0102040335,-0.2336782595            |                                                       |
| O,3.3640106009,0.18077158,2.0800855446               |                                                       |
| H,2.5202357627,0.3344303274,2.5167958642             |                                                       |
| H,3.7433310499,-0.5750623575,2.5153651613            |                                                       |
| O,2.5172680833,-0.0004078387,-0.445786581            |                                                       |
| H,2.9423839062,0.0421824204,0.4313561352             |                                                       |
| H,2.9024138326,0.6886343865,-0.9752448215            |                                                       |
| Br,0.1063515158,0.365469899,2.855961228              |                                                       |
| <b>Exit Complex, in Å</b>                            |                                                       |
| 0 2                                                  |                                                       |
| O,-0.0000095566,0.0000361683,-0.0000080045           |                                                       |
| H,-0.000010887,-0.0000080782,1.6550964605            |                                                       |
| H,0.9667311645,0.0000114439,-0.2339059483            |                                                       |
| O,3.4199367259,0.0865454852,2.1834326869             |                                                       |
| H,2.5882117889,0.1856367704,2.6515566343             |                                                       |
| H,3.8285759769,-0.6880859324,2.5545280701            |                                                       |
| O,2.6046622209,-0.0111887119,-0.3990932744           |                                                       |
| H,3.0038029885,0.0211029738,0.485295672              |                                                       |
| H,3.0354091472,0.6561082071,-0.9203844877            |                                                       |
| Br,0.1287953346,0.0486221293,3.1202155551            |                                                       |

**Table S3.** Cartesian coordinates (in Å) for optimized stationary points in pathway (b) of the  $\text{Br} + (\text{H}_2\text{O})_3 \rightarrow \text{HBr} + (\text{H}_2\text{O})_2\text{OH}$  reaction, as shown in Figure S1 and Figure 1, obtained at the MPW1K/cc-pVTZ(-PP) level of theory.

|                                                      |                                                       |
|------------------------------------------------------|-------------------------------------------------------|
| <b><i>uud</i>-(H<sub>2</sub>O)<sub>3</sub>, in Å</b> | <b><i>ud</i>-(H<sub>2</sub>O)<sub>2</sub>OH, in Å</b> |
| 0 1                                                  | 0 2                                                   |
| O,0.2973653142,0.7447415337,-0.141269676             | O,-0.195142335,-0.2083715694,0.0484520945             |
| H,0.077234833,0.6208494016,0.7743246814              | H,0.1019051642,0.2141410142,-0.7663837464             |
| H,1.0474808588,0.162329631,-0.3158292958             | H,-0.9710892866,0.2623113864,0.3294134349             |
| O,2.1669429919,2.4961115369,-1.1813094804            | O,0.5553236426,0.1081958361,-2.57257675               |
| H,1.3527864973,2.1637343813,-0.7840553349            | H,0.4169679725,-0.8425889894,-2.5653494144            |
| H,2.4665837078,3.2024870649,-0.621560374             | H,1.433486602,0.2455128399,-2.9084534231              |
| O,2.799396646,-0.1648077755,-0.8592898722            | O,-0.1669055015,-2.4540280054,-1.4997418571           |
| H,2.8681295377,0.777530389,-1.0579689104             | H,-0.2774685537,-1.8098320639,-0.7689781584           |
| H,2.9451677129,-0.6152350913,-1.6830653029           |                                                       |
| <b>Entrance Complex, in Å</b>                        | <b>HBr, in Å</b>                                      |
| 0 2                                                  | 0 1                                                   |
| O,0.,0.,0.                                           | H,0.,0.,0.04429631                                    |
| H,0.,0.,0.95249                                      | Br,0.,0.,1.45570369                                   |
| H,0.939465273,0.,-0.2756147393                       |                                                       |
| O,2.0393705943,2.3080664512,-2.4202047236            |                                                       |
| H,1.2707044413,2.5776846711,-1.9129855119            |                                                       |
| H,1.7234964373,2.1726226727,-3.3071646935            |                                                       |
| O,2.5098276792,0.088158139,-0.9209143136             |                                                       |
| H,2.4724966162,0.8470988327,-1.5229675561            |                                                       |
| H,3.264166991,0.2311249667,-0.3614210706             |                                                       |
| Br,-0.6109705486,2.4054471303,-0.2882979255          |                                                       |
| <b>Transition State, in Å</b>                        |                                                       |
| 0 2                                                  |                                                       |
| O,-0.0168370579,-0.019497235,0.0076885358            |                                                       |
| H,-0.0344347814,-0.033424082,1.3236320501            |                                                       |
| H,0.9681890396,-0.0202068102,-0.2282032935           |                                                       |
| O,3.3478515588,0.3673868747,2.0730381011             |                                                       |
| H,2.5011144612,0.3110230149,2.5276997533             |                                                       |
| H,3.71810293,1.2057925008,2.3275265182               |                                                       |
| O,2.512932934,0.0137654187,-0.4365824712             |                                                       |
| H,2.9314250122,0.1532889926,0.4341895443             |                                                       |
| H,2.9444961645,-0.7327030024,-0.8363616762           |                                                       |
| Br,0.090176204,0.341008274,2.8535881986              |                                                       |
| <b>Exit Complex, in Å</b>                            |                                                       |
| 0 2                                                  |                                                       |
| O,-0.0000191458,0.0001233627,-0.0000197984           |                                                       |
| H,0.0000253107,0.0000051227,1.6550791036             |                                                       |
| H,0.9667192275,0.000072593,-0.2339270247             |                                                       |
| O,3.4199854725,-0.086686389,2.1833738458             |                                                       |
| H,2.5882694352,-0.1858340464,2.6515022878            |                                                       |
| H,3.8285578398,0.687985139,2.5544606896              |                                                       |
| O,2.6046582845,0.0111010202,-0.3991405643            |                                                       |
| H,3.0038151448,-0.0212178921,0.4852400761            |                                                       |
| H,3.0353236986,-0.6562499502,-0.9204296835           |                                                       |
| Br,0.1288516163,-0.0487686229,3.1201921542           |                                                       |

**Table S4.** Cartesian coordinates (in Å) for optimized stationary points in pathway (c) of the Br + (H<sub>2</sub>O)<sub>3</sub> → HBr + (H<sub>2</sub>O)<sub>2</sub>OH reaction, as shown in Figure S1 and Figure 1, obtained at the MPW1K/cc-pVTZ(-PP) level of theory.

|                                                      |                                                       |
|------------------------------------------------------|-------------------------------------------------------|
| <b><i>uud</i>-(H<sub>2</sub>O)<sub>3</sub>, in Å</b> | <b><i>uu</i>-(H<sub>2</sub>O)<sub>2</sub>OH, in Å</b> |
| 0 1                                                  | 0 2                                                   |
| O,0.2973653142,0.7447415337,-0.141269676             | O,-0.0166968205,-0.1409349551,0.0723053137            |
| H,0.077234833,0.6208494016,0.7743246814              | H,-0.0592244187,0.262280938,-0.8021173879             |
| H,1.0474808588,0.162329631,-0.3158292958             | H,-0.8472101174,0.0365237897,0.4973983907             |
| O,2.1669429919,2.4961115369,-1.1813094804            | O,0.2890771233,0.1159337507,-2.6477504019             |
| H,1.3527864973,2.1637343813,-0.7840553349            | H,0.5364717188,-0.8070186355,-2.5485533781            |
| H,2.4665837078,3.2024870649,-0.621560374             | H,-0.3021017442,0.1553118022,-3.3900972282            |
| O,2.799396646,-0.1648077755,-0.8592898722            | O,0.7233299134,-2.3757716081,-1.2985360426            |
| H,2.8681295377,0.777530389,-1.0579689104             | H,0.4734868336,-1.7309846333,-0.6038901238            |
| H,2.9451677129,-0.6152350913,-1.6830653029           |                                                       |
| <b>Entrance Complex, in Å</b>                        | <b>HBr, in Å</b>                                      |
| 0 2                                                  | 0 1                                                   |
| O,-0.0000048347,0.000007598,0.0000067431             | H,0.,0.,0.04429631                                    |
| H,0.0000414572,0.0000205896,-0.9528341333            | Br,0.,0.,1.45570369                                   |
| H,-0.9422877026,-0.0000008979,0.2665215687           |                                                       |
| O,-2.502956267,-2.6605485834,1.614195852             |                                                       |
| H,-1.6449777833,-2.836873304,1.2216537652            |                                                       |
| H,-2.3985756566,-2.8540637794,2.5394168946           |                                                       |
| O,-2.5708069458,-0.088886083,0.7089414567            |                                                       |
| H,-2.7001301961,-0.9682584708,1.0944500084           |                                                       |
| H,-2.8914458054,0.5393240589,1.3451717992            |                                                       |
| Br,0.6269569946,-2.3998355545,0.2960995078           |                                                       |
| <b>Transition State, in Å</b>                        |                                                       |
| 0 2                                                  |                                                       |
| O,0.0058006281,0.0410198652,-0.0065968858            |                                                       |
| H,0.0214640095,0.0367311741,-1.3369291241            |                                                       |
| H,-0.9755863068,0.0176252253,0.2348487006            |                                                       |
| O,-3.3674830018,-0.3185396919,-2.0723143964          |                                                       |
| H,-2.515915362,-0.2796618161,-2.5189137775           |                                                       |
| H,-3.7959965796,-1.0977857354,-2.4087364449          |                                                       |
| O,-2.5186257652,-0.0007170614,0.4496250137           |                                                       |
| H,-2.95910156,-0.1410031111,-0.4084231616            |                                                       |
| H,-2.8967419197,-0.6138927529,1.0689307122           |                                                       |
| Br,-0.0993567508,-0.3804010621,-2.8469206825         |                                                       |
| <b>Exit Complex, in Å</b>                            |                                                       |
| 0 2                                                  |                                                       |
| O,-0.0000083938,0.0000134759,-0.0000029967           |                                                       |
| H,0.0000001778,-0.0000380393,-1.6644219592           |                                                       |
| H,-0.9664868283,0.0000171612,0.2284302444            |                                                       |
| O,-3.3958668721,-0.5221267957,-2.1928316405          |                                                       |
| H,-2.6000747105,-0.2731981781,-2.667202209           |                                                       |
| H,-3.586361681,-1.4097755666,-2.4762032247           |                                                       |
| O,-2.6064748057,0.0138928778,0.3534865256            |                                                       |
| H,-3.0181656127,-0.2097635264,-0.4953748026          |                                                       |
| H,-3.1107546521,-0.4072875745,1.0385966628           |                                                       |
| Br,-0.129575803,-0.033911973,-3.1278273047           |                                                       |

**Table S5.** Cartesian coordinates (in Bohr) for optimized stationary points in pathway (a) of the  $\text{Br} + (\text{H}_2\text{O})_3 \rightarrow \text{HBr} + (\text{H}_2\text{O})_2\text{OH}$  reaction, as shown in Figure 1, obtained at the CCSD(T)/cc-pVDZ(-PP) level of theory.

|                                                         |                                                          |
|---------------------------------------------------------|----------------------------------------------------------|
| <b><i>uud</i>-(H<sub>2</sub>O)<sub>3</sub>, in Bohr</b> | <b><i>ud</i>-(H<sub>2</sub>O)<sub>2</sub>OH, in Bohr</b> |
| 0 1                                                     | 0 2                                                      |
| O,-2.57756438,1.62979841,-0.11187444                    | O,2.08916373,-2.41146961,-0.00624496                     |
| H,-3.36036450,1.88148465,1.52036232                     | O,-3.04310421,-0.47601863,-0.10960786                    |
| H,-2.23016354,-0.18763709,-0.10804916                   | O,1.12498437,2.72389333,0.11737253                       |
| O,2.70489029,1.39960166,-0.09845909                     | H,2.22639939,-0.53836559,0.04356213                      |
| H,0.97088909,2.03720930,-0.19000541                     | H,-1.66746174,-1.70040548,-0.16012168                    |
| H,3.30632743,2.08850654,1.48372189                      | H,-3.89854951,-0.89545470,1.45035572                     |
| O,-0.13029905,-3.03770681,0.12448214                    | H,-0.61727423,2.10478569,0.11022133                      |
| H,1.26945573,-1.82835523,0.14995884                     | H,1.24229538,3.62581003,-1.46813654                      |
| H,0.09104168,-3.85937417,-1.49346469                    |                                                          |
| <b>Entrance Complex, in Bohr</b>                        | <b>HBr, in Bohr</b>                                      |
| 0 2                                                     | 0 1                                                      |
| O,0.69284309,-3.55737554,-0.32962020                    | H,-0.00000000,0.00000000,2.66119360                      |
| H,0.39028600,-4.28755878,1.32333849                     | Br 0.00000000,0.00000000,-0.03398472                     |
| H,2.40028644,-2.82937928,-0.13952655                    |                                                          |
| O,3.61973610,3.54232321,-0.23746869                     |                                                          |
| H,1.88677064,3.07414746,-0.62373585                     |                                                          |
| H,3.43374137,4.42575893,1.35387835                      |                                                          |
| O,5.33967585,-1.38597339,0.31289872                     |                                                          |
| H,4.95549956,0.42300665,0.20180501                      |                                                          |
| H,6.44585630,-1.65239495,-1.11803995                    |                                                          |
| Br -2.20547125,0.29476458,0.03877709                    |                                                          |
| <b>Transition State, in Bohr</b>                        |                                                          |
| 0 2                                                     |                                                          |
| O,1.28192613,3.85247825,-0.16307325                     |                                                          |
| H,-0.41105951,2.10144715,-0.60316335                    |                                                          |
| H,2.90256388,2.81833625,-0.02067603                     |                                                          |
| O,3.24071500,-3.70047061,-0.03828466                    |                                                          |
| H,1.49100649,-3.21317279,0.25973093                     |                                                          |
| H,3.14921288,-4.51182994,-1.67559153                    |                                                          |
| O,5.31465520,1.01063117,0.06774452                      |                                                          |
| H,4.74466824,-0.75941716,-0.05408348                    |                                                          |
| H,6.24378299,1.04620892,1.64230616                      |                                                          |
| Br -2.22519492,-0.20347837,0.03284591                   |                                                          |
| <b>Exit Complex, in Bohr</b>                            |                                                          |
| 0 2                                                     |                                                          |
| O,2.14017185,-4.02235737,-0.02190925                    |                                                          |
| H,-0.51603406,-1.86233884,0.03701665                    |                                                          |
| H,3.63036490,-2.85668391,0.02727305                     |                                                          |
| O,3.00631890,3.90245684,-0.10709834                     |                                                          |
| H,1.30395743,3.29738634,-0.43253366                     |                                                          |
| H,2.82139984,4.73455924,1.51168413                      |                                                          |
| O,5.84637805,-0.50017221,0.12092972                     |                                                          |
| H,4.96994558,1.13278355,0.08002013                      |                                                          |
| H,6.99757606,-0.39032664,-1.29387093                    |                                                          |
| Br -2.47328459,0.07388520,0.00253637                    |                                                          |

**Table S6.** Cartesian coordinates (in Bohr) for optimized stationary points in pathway (a) of the  $\text{Br} + (\text{H}_2\text{O})_3 \rightarrow \text{HBr} + (\text{H}_2\text{O})_2\text{OH}$  reaction, as shown in Figure 1, obtained at the CCSD(T)/cc-pVTZ(-PP) level of theory.

| <i>uud</i> -( $\text{H}_2\text{O}$ ) <sub>3</sub> , in Bohr | <i>ud</i> -( $\text{H}_2\text{O}$ ) <sub>2</sub> OH, in Bohr |
|-------------------------------------------------------------|--------------------------------------------------------------|
| 0 1                                                         | 0 2                                                          |
| O,-2.65261793,1.50032150,-0.10633497                        | O,2.05865745,-2.44944340,-0.00663349                         |
| H,-3.73963216,1.75797437,1.32120417                         | O,-3.03637394,-0.43704961,-0.10463192                        |
| H,-2.24923826,-0.29155296,-0.06591336                       | O,1.16039085,2.70740037,0.11271341                           |
| O,2.62996378,1.52947819,-0.09357003                         | H,2.23137593,-0.59517469,-0.00805151                         |
| H,0.89232610,2.12158252,-0.04928732                         | H,-1.71388891,-1.69973794,-0.03697262                        |
| H,3.43796005,2.34824833,1.30720704                          | H,-4.16675174,-0.87392300,1.24386732                         |
| O,0.02122954,-3.03590337,0.12076531                         | H,-0.59219356,2.16460567,0.06392521                          |
| H,1.37796825,-1.79759531,0.10412966                         | H,1.34228361,3.84656004,-1.28574921                          |
| H,0.30322555,-4.04178710,-1.36133603                        |                                                              |
| <b>Entrance Complex, in Bohr</b>                            | <b>HBr, in Bohr</b>                                          |
| 0 2                                                         | 0 1                                                          |
| O,0.77242142,-3.58041303,-0.15546373                        | H,-0.00000000,0.00000000,2.64652073                          |
| H,0.48695690,-4.24733869,1.51143234                         | Br 0.00000000,0.00000000,-0.03379734                         |
| H,2.46416707,-2.82777252,-0.06567435                        |                                                              |
| O,3.44574308,3.56510462,-0.12490149                         |                                                              |
| H,1.70826003,3.03203793,-0.30837915                         |                                                              |
| H,3.44491038,4.56381675,1.39088010                          |                                                              |
| O,5.38109115,-1.27883136,0.15307129                         |                                                              |
| H,4.95495272,0.51093413,0.08537282                          |                                                              |
| H,6.49294888,-1.54579410,-1.25467034                        |                                                              |
| Br -2.19523720,0.26885760,0.00844494                        |                                                              |
| <b>Transition State, in Bohr</b>                            |                                                              |
| 0 2                                                         |                                                              |
| O,1.38197776,3.80736748,-0.27151537                         |                                                              |
| H,-0.43072483,1.98202457,-0.67552527                        |                                                              |
| H,2.96897280,2.78642833,-0.04783137                         |                                                              |
| O,3.14332645,-3.69212847,-0.11637107                        |                                                              |
| H,1.41112340,-3.12978714,0.05549824                         |                                                              |
| H,3.16635067,-4.60650174,-1.68424903                        |                                                              |
| O,5.42476784,0.92092893,0.17177928                          |                                                              |
| H,4.82389637,-0.82136327,0.03444264                         |                                                              |
| H,6.36167376,0.98236847,1.72369660                          |                                                              |
| Br -2.25036490,-0.17416261,0.05138516                       |                                                              |
| <b>Exit Complex, in Bohr</b>                                |                                                              |
| 0 2                                                         |                                                              |
| O,2.18561293,-3.97486798,0.02638329                         |                                                              |
| H,-0.49051987,-1.84920807,0.06583094                        |                                                              |
| H,3.64707832,-2.79701980,0.02694406                         |                                                              |
| O,2.88248970,3.85719825,-0.07057802                         |                                                              |
| H,1.20373716,3.16535719,-0.26330114                         |                                                              |
| H,2.78873506,4.82661325,1.46138176                          |                                                              |
| O,5.86092102,-0.42314941,0.06751678                         |                                                              |
| H,4.97587578,1.19185081,0.01819207                          |                                                              |
| H,7.09509278,-0.33189152,-1.25719329                        |                                                              |
| Br -2.46050799,0.05590265,-0.00538904                       |                                                              |



## **Complete Gaussian 16 reference**

M. J. Frisch, G. W. Trucks, H. B. Schlegel, G. E. Scuseria, M. A. Robb, J. R. Cheeseman, G. Scalmani, V. Barone, G. A. Petersson, H. Nakatsuji, X. Li, M. Caricato, A. V. Marenich, J. Bloino, B. G. Janesko, R. Gomperts, B. Mennucci, H. P. Hratchian, J. V. Ortiz, A. F. Izmaylov, J. L. Sonnenberg, D. Williams-Young, F. Ding, F. Lipparini, F. Egidi, J. Goings, B. Peng, A. Petrone, T. Henderson, D. Ranasinghe, V. G. Zakrzewski, J. Gao, N. Rega, G. Zheng, W. Liang, M. Hada, M. Ehara, K. Toyota, R. Fukuda, J. Hasegawa, M. Ishida, T. Nakajima, Y. Honda, O. Kitao, H. Nakai, T. Vreven, K. Throssell, J. A. Montgomery, Jr., J. E. Peralta, F. Ogliaro, M. J. Bearpark, J. J. Heyd, E. N. Brothers, K. N. Kudin, V. N. Staroverov, T. A. Keith, R. Kobayashi, J. Normand, K. Raghavachari, A. P. Rendell, J. C. Burant, S. S. Iyengar, J. Tomasi, M. Cossi, J. M. Millam, M. Klene, C. Adamo, R. Cammi, J. W. Ochterski, R. L. Martin, K. Morokuma, O. Farkas, J. B. Foresman, and D. J. Fox, Gaussian 16, Revision B.01, Gaussian, Inc., Wallingford CT, **2016**.
